# Supplementary material for: Extraction of Heavy Metals from Aqueous Medium by Husk Biomass: Adsorption Isotherm, Kinetic and Thermodynamic study
Source: publisher site journal article supplement (doi:10.1515/zpch-2018-1182), 2018-05-05
Supplement: Supplementary file 1 [file zpch-2018-1182_suppl.docx]

**Supporting Information**

**Extraction of Heavy Metals from Aqueous Medium by Husk Biomass: Adsorption Isotherm, Kinetic and Thermodynamic study**

Khalida Naseem, Rahila Huma, Aiman Shahbaz, Jawaria Jamal, Muhammad Zia Ur Rehman, Ahsan Sharif, Ejaz Ahmed, Robina Begum, Ahmad Irfan, Abdullah G. Al-Sehemi, Zahoor H. Farooqi*


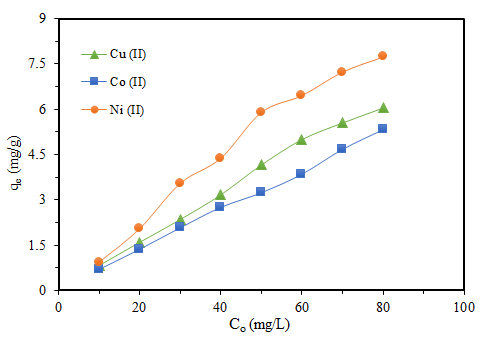


**Fig. 1S:** Relation between concentration of metal ions and adsorption capacity of husk biomass at ambient temperature [Conditions: adsorbent dose = 1.0 × 10-2, 1.2 × 10-2 and 1.4 × 10-2 g/mL for Cu (II), Co (II) and Ni (II) ions respectively at agitation speed of 125 rpm .


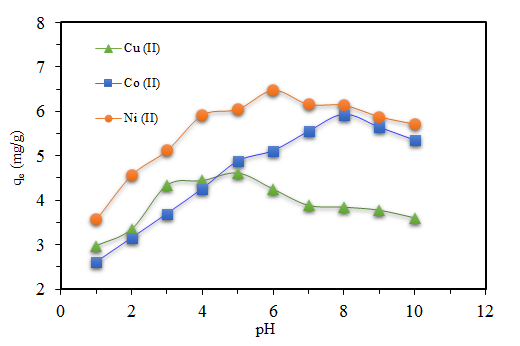


**Fig. 2S:** Effect of pH of the medium on adsorption capacity of biosorbent for adsorption of Cu (II), Co (II) and Ni (II) ions using husk biomass biomass, [Conditions: concentration of solutions = 50 mg/L agitation speed = 125 rpm and agitation time = 42, 40 and 32 minutes for Cu (II), Co (II) and Ni (II) ions].
